# Supplementary material for: Changing Temperature Conditions during Somatic Embryo Maturation Result in Pinus pinaster Plants with Altered Response to Heat Stress
Source: Int J Mol Sci. 2022 Jan 24;23(3):1318. doi: 10.3390/ijms23031318 (PMC8835971; doi:10.3390/ijms23031318)
Supplement: Supplementary file 1 [file ijms-23-01318-s001.zip › ijms-1555485-supplementary.pdf]

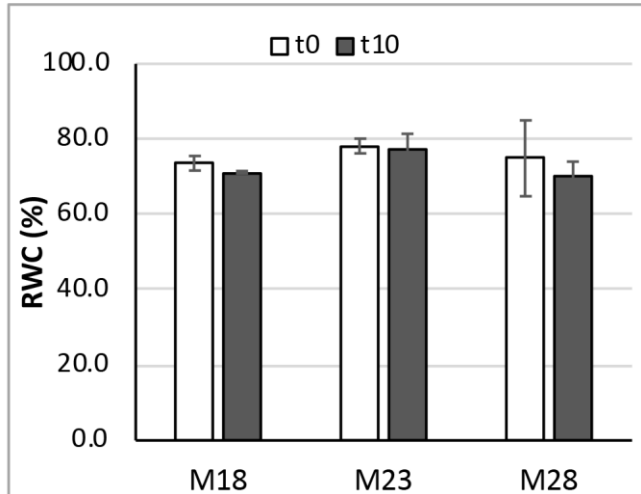

**Figure S1.** Relative water content (RWC) of maritime pine needles sampled in plants derived from somatic embryos matured at different temperatures (18, 23 or 28°C) that were employed in a heat stress experiment for 10 days at 45°C. Plants were sampled at the beginning (t0) and at the end (t10) of the stress treatment. Data are mean  $\pm$  SD of 6 replicates.

### Supplementary data

| Table S1. Cytokinins determined in this study.    |                                               |
|---------------------------------------------------|-----------------------------------------------|
| Abbr.                                             | Cytokinin                                     |
| De novo biosynthesis of iP-, tZ- and DHZ-type CKs |                                               |
| iP                                                | isopentenyladenine                            |
| iPR                                               | isopentenyladenosine                          |
| iPRMP                                             | isopentenyladenosine-5'monophosphate          |
| iP7G                                              | isopentenyladenine-7-glucoside                |
| iP9G                                              | isopentenyladenine-9-glucoside                |
|                                                   |                                               |
| tZ                                                | <i>trans</i> -zeatin                          |
| tZR                                               | <i>trans</i> -zeatin riboside                 |
| tZRMP                                             | <i>trans</i> -zeatin riboside-5'monophosphate |
| tZOG                                              | <i>trans</i> -zeatin-O-glucoside              |
| tZROG                                             | <i>trans</i> -zeatin riboside-O-glucoside     |
| tZ7G                                              | <i>trans</i> -zeatin-7-glucoside*             |
| tZ9G                                              | <i>trans</i> -zeatin-9-glucoside              |
|                                                   |                                               |
| DZ                                                | dihydrozeatin                                 |
| DZR                                               | dihydrozeatin riboside                        |
| DZRMP                                             | dihydrozeatin riboside-5'monophosphate        |

|                                                   |                                              |
|---------------------------------------------------|----------------------------------------------|
| DZOG                                              | dihydrozeatin-O-glucoside                    |
| DZROG                                             | dihydrozeatin riboside-O-glucoside           |
| DZ7G                                              | dihydrozeatin-7-glucoside*                   |
| DZ9G                                              | dihydrozeatin-9-glucoside                    |
|                                                   |                                              |
| tRNA degradation pathway (main source of cZ-types |                                              |
| <i>cZ</i>                                         | <i>cis</i> -zeatin                           |
| <i>cZR</i>                                        | <i>cis</i> -zeatin riboside                  |
| <i>cZRMP</i>                                      | <i>cis</i> -zeatin riboside-5'monophosphate* |
| <i>cZOG</i>                                       | <i>cis</i> -zeatin-O-glucoside               |
| <i>cZROG</i>                                      | <i>cis</i> -zeatin riboside-O-glucoside      |
| <i>cZ7G</i>                                       | <i>cis</i> -zeatin-7-glucoside*              |
| <i>cZ9G</i>                                       | <i>cis</i> -zeatin-9-glucoside               |

\*Not detected in the analysed samples
